# Supplementary material
Source: publisher figshare collection journal article supplement (https://acs.figshare.com/ndownloader/files/3936559)
Supplement: Supplementary file 1 [file 3936559]

#File Cl-Cl6BsubPc k09258.cif 
#===================================================================
data_global

# 1. SUBMISSION DETAILS

_publ_contact_author_name        'Timothy P. Bender'
_publ_contact_author_email       tim.bender@utoronto.ca
_publ_contact_author_address
;
Department of Chemical Engineering and Applied Chemistry
University of Toronto
200 College St., Toronto, Ontario, Canada. M5S 3E5
;

_publ_requested_journal        'Cryst. Growth & Des.'

# 2. TITLE AND AUTHOR LIST
_publ_section_title              
;
Crystal and Solid State Arrangement Trends of 
Halogenated Boron Subphthalocyanines.
;

loop_
_publ_author_name
_publ_author_footnote
_publ_author_address
'Morse, G.E.'  ?
;    
Department of Chemical Engineering and Applied Chemistry
University of Toronto
200 College Street, Toronto, Ontario, Canada. M5S3E5
;

'Gong, I.'  ?
;    
Department of Chemical Engineering and Applied Chemistry
University of Toronto
200 College Street, Toronto, Ontario, Canada. M5S3E5
;

'Kawar, Y.'  ?
;    
Department of Chemical Engineering and Applied Chemistry
University of Toronto
200 College Street, Toronto, Ontario, Canada. M5S3E5
;

'Bender, Timothy P.*'  ?
;    
Department of Chemical Engineering and Applied Chemistry
University of Toronto
200 College Street, Toronto, Ontario, Canada. M5S3E5
;

#======================================================================
# 3. TEXT

_publ_section_abstract
;
TBD
;

#=====================================================================   

data_Cl-Cl6BsubPc[k09258]
_chemical_name_systematic		
Chlorodo(hexachlorosubphthalocyaninato)boron(III)

_chemical_name_common
Cl-Cl6BsubPc

_chemical_melting_point           ?
_chemical_formula_moiety          'C24 H6 B Cl7 N6'
_chemical_formula_sum
 'C24 H6 B Cl7 N6'
_chemical_formula_weight          637.31

loop_
 _atom_type_symbol
 _atom_type_description
 _atom_type_scat_dispersion_real
 _atom_type_scat_dispersion_imag
 _atom_type_scat_source
 'C'  'C'   0.0033   0.0016
 'International Tables Vol C Tables 4.2.6.8 and 6.1.1.4'
 'H'  'H'   0.0000   0.0000
 'International Tables Vol C Tables 4.2.6.8 and 6.1.1.4'
 'N'  'N'   0.0061   0.0033
 'International Tables Vol C Tables 4.2.6.8 and 6.1.1.4'
 'B'  'B'   0.0013   0.0007
 'International Tables Vol C Tables 4.2.6.8 and 6.1.1.4'
 'Cl'  'Cl'   0.1484   0.1585
 'International Tables Vol C Tables 4.2.6.8 and 6.1.1.4'

_symmetry_cell_setting            monoclinic
_symmetry_space_group_name_H-M    'P 21/n'
_symmetry_space_group_name_Hall    '-P 2yn'

loop_
 _symmetry_equiv_pos_as_xyz
 'x, y, z'
 '-x+1/2, y+1/2, -z+1/2'
 '-x, -y, -z'
 'x-1/2, -y-1/2, z-1/2'

_cell_length_a                    13.1035(3)
_cell_length_b                    7.4123(2)
_cell_length_c                    25.5026(6)
_cell_angle_alpha                 90.00
_cell_angle_beta                  99.5430(14)
_cell_angle_gamma                 90.00
_cell_volume                      2442.71(10)
_cell_formula_units_Z             4
_cell_measurement_temperature     150(1)
_cell_measurement_reflns_used     16092
_cell_measurement_theta_min       2.7
_cell_measurement_theta_max       27.5

_exptl_crystal_description        'plate'
_exptl_crystal_colour             'red'
_exptl_crystal_size_max           0.36
_exptl_crystal_size_mid           0.20
_exptl_crystal_size_min           0.06
_exptl_crystal_density_meas       ?
_exptl_crystal_density_diffrn     1.733
_exptl_crystal_density_method     'not measured'
_exptl_crystal_F_000              1264
_exptl_absorpt_coefficient_mu     0.843
# Absorption correction

_exptl_absorpt_correction_type multi-scan
_exptl_absorpt_correction_T_min  0.721
_exptl_absorpt_correction_T_max  0.954
_exptl_absorpt_process_details
;
multi-scan from symmetry-related measurements
 Sortav (Blessing 1995)
;


_exptl_special_details
?

_diffrn_ambient_temperature       150(1)
_diffrn_radiation_wavelength      0.71073
_diffrn_radiation_type            MoK\a
_diffrn_radiation_source          'fine-focus sealed tube'
_diffrn_radiation_monochromator   graphite
_diffrn_measurement_device_type   'Nonius KappaCCD'
_diffrn_measurement_method        '\f scans and \w scans with \k offsets'
_diffrn_detector_area_resol_mean  9
_diffrn_reflns_number             16092
_diffrn_reflns_av_R_equivalents   0.0446
_diffrn_reflns_av_sigmaI/netI     0.0496
_diffrn_reflns_limit_h_min        -17
_diffrn_reflns_limit_h_max        16
_diffrn_reflns_limit_k_min        -8
_diffrn_reflns_limit_k_max        9
_diffrn_reflns_limit_l_min        -33
_diffrn_reflns_limit_l_max        33
_diffrn_reflns_theta_min          2.67
_diffrn_reflns_theta_max          27.51
_reflns_number_total              5584
_reflns_number_gt                 3992
_reflns_threshold_expression      'I>2\s(I)'


_computing_data_collection        'Collect (Nonius B.V., 1997-2002)'
_computing_cell_refinement        'Denzo-SMN (Otwinowski & Minor, 1997)'
_computing_data_reduction         'Denzo-SMN'
_computing_structure_solution     'SIR-92 (Altomare et al., 1994)'
_computing_structure_refinement   'SHELXTL V6.1 (Sheldrick, 2008)'
_computing_molecular_graphics     'PLATON (Spek, 2009)'
_computing_publication_material   'SHELXTL V6.1'

_refine_special_details
;
 Refinement of F^2^ against ALL reflections.  The weighted R-factor wR and
 goodness of fit S are based on F^2^, conventional R-factors R are based
 on F, with F set to zero for negative F^2^. The threshold expression of
 F^2^ > 2sigma(F^2^) is used only for calculating R-factors(gt) etc. and is
 not relevant to the choice of reflections for refinement.  R-factors based
 on F^2^ are statistically about twice as large as those based on F, and R-
 factors based on ALL data will be even larger.
;

_refine_ls_structure_factor_coef  Fsqd
_refine_ls_matrix_type            full
_refine_ls_weighting_scheme       calc
_refine_ls_weighting_details
 'calc w=1/[\s^2^(Fo^2^)+(0.0606P)^2^+1.0634P] where P=(Fo^2^+2Fc^2^)/3'
_atom_sites_solution_primary      direct
_atom_sites_solution_secondary    difmap
_atom_sites_solution_hydrogens    geom
_refine_ls_hydrogen_treatment     constr
_refine_ls_extinction_method      none
_refine_ls_extinction_coef        ?
_refine_ls_number_reflns          5584
_refine_ls_number_parameters      343
_refine_ls_number_restraints      0
_refine_ls_R_factor_all           0.0727
_refine_ls_R_factor_gt            0.0444
_refine_ls_wR_factor_ref          0.1226
_refine_ls_wR_factor_gt           0.1065
_refine_ls_goodness_of_fit_ref    1.042
_refine_ls_restrained_S_all       1.042
_refine_ls_shift/su_max           0.001
_refine_ls_shift/su_mean          0.000

loop_
 _atom_site_label
 _atom_site_type_symbol
 _atom_site_fract_x
 _atom_site_fract_y
 _atom_site_fract_z
 _atom_site_U_iso_or_equiv
 _atom_site_adp_type
 _atom_site_occupancy
 _atom_site_symmetry_multiplicity
 _atom_site_calc_flag
 _atom_site_refinement_flags
 _atom_site_disorder_assembly
 _atom_site_disorder_group
Cl1 Cl 0.61270(5) -0.25225(9) 0.33888(3) 0.03284(17) Uani 1 1 d . . .
Cl2 Cl 0.35689(6) 0.78068(12) 0.40924(4) 0.0552(2) Uani 1 1 d . . .
Cl3 Cl 0.56258(6) 0.78135(10) 0.49208(3) 0.03903(19) Uani 1 1 d . . .
Cl4 Cl 1.20601(5) 0.27839(11) 0.40987(3) 0.0423(2) Uani 1 1 d . . .
Cl5 Cl 1.20963(6) 0.16585(12) 0.29147(3) 0.0461(2) Uani 1 1 d . . .
Cl6 Cl 0.60075(6) 0.18501(12) 0.02421(3) 0.0451(2) Uani 1 1 d . . .
Cl7 Cl 0.37761(5) 0.29239(10) 0.04368(3) 0.03953(19) Uani 1 1 d . . .
N1 N 0.60296(15) 0.1210(3) 0.34791(8) 0.0251(5) Uani 1 1 d . . .
N2 N 0.76223(16) 0.1841(3) 0.40516(8) 0.0268(5) Uani 1 1 d . . .
N3 N 0.75969(15) 0.0098(3) 0.32652(8) 0.0241(4) Uani 1 1 d . . .
N4 N 0.77376(15) -0.0283(3) 0.23531(8) 0.0250(5) Uani 1 1 d . . .
N5 N 0.60875(15) 0.0136(3) 0.26157(8) 0.0246(4) Uani 1 1 d . . .
N6 N 0.46611(16) 0.1916(3) 0.27728(8) 0.0260(5) Uani 1 1 d . . .
C1 C 0.51295(19) 0.2094(3) 0.32831(10) 0.0255(5) Uani 1 1 d . . .
C2 C 0.50052(19) 0.3455(4) 0.36770(10) 0.0274(6) Uani 1 1 d . . .
C3 C 0.4261(2) 0.4789(4) 0.36939(10) 0.0316(6) Uani 1 1 d . . .
H3A H 0.3641 0.4809 0.3441 0.038 Uiso 1 1 calc R . .
C4 C 0.4451(2) 0.6081(4) 0.40874(11) 0.0324(6) Uani 1 1 d . . .
C5 C 0.5369(2) 0.6072(4) 0.44652(10) 0.0319(6) Uani 1 1 d . . .
C6 C 0.6104(2) 0.4748(3) 0.44589(10) 0.0285(6) Uani 1 1 d . . .
H6A H 0.6719 0.4734 0.4715 0.034 Uiso 1 1 calc R . .
C7 C 0.59199(19) 0.3438(3) 0.40680(10) 0.0266(5) Uani 1 1 d . . .
C8 C 0.6591(2) 0.2044(3) 0.39114(9) 0.0255(5) Uani 1 1 d . . .
C9 C 0.81120(19) 0.0966(3) 0.37047(9) 0.0253(5) Uani 1 1 d . . .
C10 C 0.91819(19) 0.1117(3) 0.36176(9) 0.0254(5) Uani 1 1 d . . .
C11 C 1.0055(2) 0.1844(3) 0.39276(10) 0.0283(6) Uani 1 1 d . . .
H11A H 1.0036 0.2250 0.4279 0.034 Uiso 1 1 calc R . .
C12 C 1.0951(2) 0.1961(4) 0.37107(10) 0.0309(6) Uani 1 1 d . . .
C13 C 1.0972(2) 0.1439(4) 0.31821(10) 0.0299(6) Uani 1 1 d . . .
C14 C 1.01040(19) 0.0728(3) 0.28678(10) 0.0280(6) Uani 1 1 d . . .
H14A H 1.0118 0.0386 0.2510 0.034 Uiso 1 1 calc R . .
C15 C 0.92089(19) 0.0528(3) 0.30902(9) 0.0248(5) Uani 1 1 d . . .
C16 C 0.81673(19) -0.0049(3) 0.28637(9) 0.0240(5) Uani 1 1 d . . .
C17 C 0.67082(19) -0.0047(3) 0.22378(9) 0.0250(5) Uani 1 1 d . . .
C18 C 0.60811(19) 0.0525(3) 0.17452(9) 0.0250(5) Uani 1 1 d . . .
C19 C 0.6351(2) 0.0740(4) 0.12452(9) 0.0280(6) Uani 1 1 d . . .
H19A H 0.7011 0.0372 0.1176 0.034 Uiso 1 1 calc R . .
C20 C 0.5639(2) 0.1498(4) 0.08549(10) 0.0293(6) Uani 1 1 d . . .
C21 C 0.4654(2) 0.2032(3) 0.09536(10) 0.0292(6) Uani 1 1 d . . .
C22 C 0.4391(2) 0.1889(3) 0.14544(10) 0.0282(6) Uani 1 1 d . . .
H22A H 0.3733 0.2279 0.1521 0.034 Uiso 1 1 calc R . .
C23 C 0.51208(19) 0.1151(3) 0.18617(10) 0.0257(5) Uani 1 1 d . . .
C24 C 0.51783(19) 0.1017(3) 0.24386(10) 0.0267(5) Uani 1 1 d . . .
B1 B 0.6466(2) -0.0245(4) 0.31871(11) 0.0265(6) Uani 1 1 d . . .

loop_
 _atom_site_aniso_label
 _atom_site_aniso_U_11
 _atom_site_aniso_U_22
 _atom_site_aniso_U_33
 _atom_site_aniso_U_23
 _atom_site_aniso_U_13
 _atom_site_aniso_U_12
Cl1 0.0372(4) 0.0292(3) 0.0333(3) 0.0046(3) 0.0090(3) -0.0032(3)
Cl2 0.0343(4) 0.0576(5) 0.0720(6) -0.0246(4) 0.0044(4) 0.0140(4)
Cl3 0.0400(4) 0.0393(4) 0.0393(4) -0.0115(3) 0.0108(3) -0.0025(3)
Cl4 0.0254(4) 0.0646(5) 0.0353(4) -0.0086(3) 0.0004(3) -0.0074(3)
Cl5 0.0285(4) 0.0700(5) 0.0420(4) -0.0116(4) 0.0124(3) -0.0097(3)
Cl6 0.0394(4) 0.0714(5) 0.0246(3) 0.0091(3) 0.0057(3) 0.0047(4)
Cl7 0.0321(4) 0.0534(5) 0.0298(3) 0.0044(3) -0.0044(3) 0.0039(3)
N1 0.0243(11) 0.0278(11) 0.0240(10) 0.0010(9) 0.0065(9) -0.0014(9)
N2 0.0261(12) 0.0324(12) 0.0215(10) 0.0006(9) 0.0035(9) 0.0017(9)
N3 0.0236(11) 0.0257(11) 0.0232(10) 0.0027(8) 0.0044(8) 0.0025(9)
N4 0.0231(11) 0.0273(11) 0.0244(10) -0.0005(9) 0.0031(8) -0.0001(9)
N5 0.0236(11) 0.0255(11) 0.0247(10) -0.0008(9) 0.0045(8) -0.0019(9)
N6 0.0203(11) 0.0305(11) 0.0271(11) 0.0003(9) 0.0040(9) -0.0038(9)
C1 0.0216(13) 0.0275(13) 0.0285(12) 0.0017(10) 0.0076(10) -0.0038(10)
C2 0.0246(13) 0.0322(14) 0.0275(12) 0.0015(11) 0.0111(10) -0.0051(11)
C3 0.0219(13) 0.0373(15) 0.0364(14) -0.0001(12) 0.0076(11) -0.0035(11)
C4 0.0256(14) 0.0355(15) 0.0391(15) -0.0025(12) 0.0137(12) 0.0006(12)
C5 0.0340(15) 0.0332(15) 0.0319(13) -0.0032(11) 0.0153(12) -0.0063(12)
C6 0.0299(14) 0.0310(14) 0.0265(13) 0.0003(11) 0.0099(11) -0.0024(11)
C7 0.0251(13) 0.0290(13) 0.0273(12) 0.0013(11) 0.0090(10) -0.0025(11)
C8 0.0269(13) 0.0296(13) 0.0204(11) 0.0016(10) 0.0055(10) -0.0026(11)
C9 0.0272(13) 0.0254(13) 0.0222(12) 0.0041(10) 0.0008(10) 0.0016(10)
C10 0.0250(13) 0.0271(13) 0.0236(12) 0.0026(10) 0.0024(10) 0.0057(11)
C11 0.0288(14) 0.0324(14) 0.0227(12) -0.0006(11) 0.0017(10) 0.0010(11)
C12 0.0267(14) 0.0335(15) 0.0308(13) -0.0013(11) -0.0001(11) -0.0009(11)
C13 0.0257(13) 0.0322(14) 0.0329(14) -0.0009(11) 0.0078(11) -0.0002(11)
C14 0.0273(13) 0.0304(13) 0.0268(12) 0.0023(11) 0.0063(10) 0.0068(11)
C15 0.0244(13) 0.0244(13) 0.0246(12) 0.0023(10) 0.0006(10) 0.0029(10)
C16 0.0254(13) 0.0218(12) 0.0255(12) 0.0013(10) 0.0067(10) 0.0027(10)
C17 0.0273(13) 0.0230(12) 0.0249(12) -0.0025(10) 0.0051(10) -0.0028(10)
C18 0.0258(13) 0.0254(13) 0.0231(12) -0.0008(10) 0.0017(10) -0.0032(10)
C19 0.0257(13) 0.0323(14) 0.0257(12) -0.0042(11) 0.0034(10) -0.0034(11)
C20 0.0310(14) 0.0342(14) 0.0220(12) -0.0025(11) 0.0020(10) -0.0033(12)
C21 0.0262(14) 0.0309(14) 0.0276(13) 0.0006(11) -0.0039(11) -0.0034(11)
C22 0.0254(13) 0.0281(14) 0.0299(13) -0.0036(11) 0.0014(11) -0.0021(11)
C23 0.0223(13) 0.0261(13) 0.0285(12) -0.0035(11) 0.0033(10) -0.0015(10)
C24 0.0212(12) 0.0280(13) 0.0311(13) -0.0004(11) 0.0048(10) -0.0032(11)
B1 0.0268(15) 0.0280(15) 0.0247(14) 0.0021(12) 0.0044(11) -0.0041(12)

_geom_special_details
;
 All esds (except the esd in the dihedral angle between two l.s. planes)
 are estimated using the full covariance matrix.  The cell esds are taken
 into account individually in the estimation of esds in distances, angles
 and torsion angles; correlations between esds in cell parameters are only
 used when they are defined by crystal symmetry.  An approximate (isotropic)
 treatment of cell esds is used for estimating esds involving l.s. planes.
;

loop_
 _geom_bond_atom_site_label_1
 _geom_bond_atom_site_label_2
 _geom_bond_distance
 _geom_bond_site_symmetry_2
 _geom_bond_publ_flag
Cl1 B1 1.840(3) . ?
Cl2 C4 1.725(3) . ?
Cl3 C5 1.732(3) . ?
Cl4 C12 1.728(3) . ?
Cl5 C13 1.731(3) . ?
Cl6 C20 1.730(3) . ?
Cl7 C21 1.731(2) . ?
N1 C8 1.368(3) . ?
N1 C1 1.369(3) . ?
N1 B1 1.478(4) . ?
N2 C9 1.343(3) . ?
N2 C8 1.347(3) . ?
N3 C16 1.369(3) . ?
N3 C9 1.369(3) . ?
N3 B1 1.485(3) . ?
N4 C16 1.341(3) . ?
N4 C17 1.343(3) . ?
N5 C17 1.367(3) . ?
N5 C24 1.368(3) . ?
N5 B1 1.486(3) . ?
N6 C24 1.350(3) . ?
N6 C1 1.350(3) . ?
C1 C2 1.452(4) . ?
C2 C3 1.394(4) . ?
C2 C7 1.426(4) . ?
C3 C4 1.380(4) . ?
C4 C5 1.411(4) . ?
C5 C6 1.377(4) . ?
C6 C7 1.384(4) . ?
C7 C8 1.455(4) . ?
C9 C10 1.460(4) . ?
C10 C11 1.387(4) . ?
C10 C15 1.420(3) . ?
C11 C12 1.382(4) . ?
C12 C13 1.407(4) . ?
C13 C14 1.382(4) . ?
C14 C15 1.393(4) . ?
C15 C16 1.455(3) . ?
C17 C18 1.446(3) . ?
C18 C19 1.388(3) . ?
C18 C23 1.418(3) . ?
C19 C20 1.367(4) . ?
C20 C21 1.412(4) . ?
C21 C22 1.381(4) . ?
C22 C23 1.401(3) . ?
C23 C24 1.464(3) . ?

loop_
 _geom_angle_atom_site_label_1
 _geom_angle_atom_site_label_2
 _geom_angle_atom_site_label_3
 _geom_angle
 _geom_angle_site_symmetry_1
 _geom_angle_site_symmetry_3
 _geom_angle_publ_flag
C8 N1 C1 113.2(2) . . ?
C8 N1 B1 122.3(2) . . ?
C1 N1 B1 123.1(2) . . ?
C9 N2 C8 116.5(2) . . ?
C16 N3 C9 113.2(2) . . ?
C16 N3 B1 122.9(2) . . ?
C9 N3 B1 122.4(2) . . ?
C16 N4 C17 116.1(2) . . ?
C17 N5 C24 113.7(2) . . ?
C17 N5 B1 122.1(2) . . ?
C24 N5 B1 123.0(2) . . ?
C24 N6 C1 117.5(2) . . ?
N6 C1 N1 122.1(2) . . ?
N6 C1 C2 130.5(2) . . ?
N1 C1 C2 105.6(2) . . ?
C3 C2 C7 119.7(2) . . ?
C3 C2 C1 132.3(2) . . ?
C7 C2 C1 107.5(2) . . ?
C4 C3 C2 118.2(2) . . ?
C3 C4 C5 121.6(2) . . ?
C3 C4 Cl2 118.7(2) . . ?
C5 C4 Cl2 119.7(2) . . ?
C6 C5 C4 120.9(2) . . ?
C6 C5 Cl3 118.7(2) . . ?
C4 C5 Cl3 120.2(2) . . ?
C5 C6 C7 118.0(2) . . ?
C6 C7 C2 121.5(2) . . ?
C6 C7 C8 130.9(2) . . ?
C2 C7 C8 106.9(2) . . ?
N2 C8 N1 123.0(2) . . ?
N2 C8 C7 129.2(2) . . ?
N1 C8 C7 105.8(2) . . ?
N2 C9 N3 122.8(2) . . ?
N2 C9 C10 129.7(2) . . ?
N3 C9 C10 105.5(2) . . ?
C11 C10 C15 120.8(2) . . ?
C11 C10 C9 131.7(2) . . ?
C15 C10 C9 107.2(2) . . ?
C12 C11 C10 118.1(2) . . ?
C11 C12 C13 121.3(2) . . ?
C11 C12 Cl4 118.9(2) . . ?
C13 C12 Cl4 119.9(2) . . ?
C14 C13 C12 121.0(2) . . ?
C14 C13 Cl5 118.7(2) . . ?
C12 C13 Cl5 120.3(2) . . ?
C13 C14 C15 118.2(2) . . ?
C14 C15 C10 120.5(2) . . ?
C14 C15 C16 131.9(2) . . ?
C10 C15 C16 107.3(2) . . ?
N4 C16 N3 122.9(2) . . ?
N4 C16 C15 129.7(2) . . ?
N3 C16 C15 105.8(2) . . ?
N4 C17 N5 123.5(2) . . ?
N4 C17 C18 129.3(2) . . ?
N5 C17 C18 105.3(2) . . ?
C19 C18 C23 121.7(2) . . ?
C19 C18 C17 129.6(2) . . ?
C23 C18 C17 108.1(2) . . ?
C20 C19 C18 118.0(2) . . ?
C19 C20 C21 121.3(2) . . ?
C19 C20 Cl6 117.4(2) . . ?
C21 C20 Cl6 121.27(19) . . ?
C22 C21 C20 121.3(2) . . ?
C22 C21 Cl7 119.8(2) . . ?
C20 C21 Cl7 118.9(2) . . ?
C21 C22 C23 118.1(2) . . ?
C22 C23 C18 119.5(2) . . ?
C22 C23 C24 133.4(2) . . ?
C18 C23 C24 106.8(2) . . ?
N6 C24 N5 121.9(2) . . ?
N6 C24 C23 130.8(2) . . ?
N5 C24 C23 105.1(2) . . ?
N1 B1 N3 105.5(2) . . ?
N1 B1 N5 105.2(2) . . ?
N3 B1 N5 105.2(2) . . ?
N1 B1 Cl1 113.41(19) . . ?
N3 B1 Cl1 113.67(19) . . ?
N5 B1 Cl1 113.07(18) . . ?

_diffrn_measured_fraction_theta_max    0.993
_diffrn_reflns_theta_full              27.51
_diffrn_measured_fraction_theta_full   0.993
_refine_diff_density_max    0.346
_refine_diff_density_min   -0.416
_refine_diff_density_rms    0.078
